# Supplementary material
Source: PubMed Central journal article supplement (PMC5280019)

## Supplementary tables

**Supplementary table 1.** Estimation of the precision of the quantification of angiogenin in urines.

Absorbances are in Arbitrary Units.

| Characteristic                        | Low concentration | High concentration |
|---------------------------------------|-------------------|--------------------|
| Day 1                                 | 0.42              | 0.82               |
|                                       | 0.47              | 0.79               |
|                                       | 0.48              | 0.69               |
|                                       | 0.42              | 0.77               |
|                                       | 0.40              | 0.77               |
| Mean                                  | 0.44              | 0.77               |
| Standard deviation                    | 0.03              | 0.04               |
| CV%                                   | <b>6.8</b>        | <b>5.1</b>         |
| Day 2                                 | 0.45              | 0.81               |
|                                       | 0.43              | 0.83               |
|                                       | 0.46              | 0.99               |
|                                       | 0.45              | 0.77               |
|                                       | 0.43              | 0.72               |
| Mean                                  | 0.45              | 0.82               |
| Standard deviation                    | 0.01              | 0.1                |
| CV%                                   | <b>2.2</b>        | <b>12.1</b>        |
| Day 3                                 | 0.47              | 0.77               |
|                                       | 0.50              | 0.83               |
|                                       | 0.46              | 0.79               |
|                                       | 0.45              | 0.85               |
|                                       | 0.44              | 0.81               |
| Mean                                  | 0.46              | 0.81               |
| Standard deviation                    | 0.02              | 0.03               |
| CV%                                   | <b>4.3</b>        | <b>3.7</b>         |
| Intralaboratory reproducibility (%CV) | <b>4.4</b>        | <b>7.5</b>         |

**Supplementary table 2.** Demographic and clinical characteristics of the cohort of the 192 patients referred for the exploration of a chronic kidney disease\*.

| Characteristic                          | Entire cohort<br>(n=192) |
|-----------------------------------------|--------------------------|
| Age (yrs)                               | 54.9±18.2                |
| Male sex-n (%)                          | 115 (61)                 |
| Caucasian-n (%)                         | 96 (50)                  |
| Cause of CKD                            |                          |
| • GN                                    | 48 (25)                  |
| • Diabetes                              | 22 (10)                  |
| • ANCA vasculitidis                     | 10 (5)                   |
| • FSGS                                  | 17 (9)                   |
| • Minimal changes disease               | 6 (3)                    |
| • Interstitial nephritis                | 25 (13)                  |
| • Myeloma                               | 9 (4)                    |
| • CNI toxicity (heart transplantation)  | 5 (2.6)                  |
| • Others                                | 50 (26)                  |
| Fibrosis <sup>¶</sup> (%)               | 27±12                    |
| Urinary angiogenin/creatinin (ng/mmol)  | 112±228                  |
| eGFR (ml/min/1.73m <sup>2</sup> )       | 57±23                    |
| Proteinuria (g/mmol creat)              | 0.35±0.65                |
| β2 microglobulin (mg/mmol creat)        | 1.63±3.96                |
| α1 microglobulin (mg/mmol creat)        | 8.41±12.04               |
| Retinol binding protein (mg/mmol creat) | 1.39±3.07                |
| Transferrin (mg/mmol creat)             | 10.5±15.05               |
| Albumin (mg/mmol creat)                 | 185±243.7                |

\* Plus-minus values are means±SD. CKD denotes chronic kidney disease, GN glomerulonephritis, ANCA anti-neutrophil cytoplasmic antibody, FSGS, focal segmental glomerulosclerosis, CNI calcineurin inhibitors, eGFR estimated glomerular filtration rate.

¶ Interstitial fibrosis was evaluated using automatic quantification by image analysis.

**Supplementary table 3.** Demographic and clinical characteristics of the cohort of the kidney transplant recipients who had a clinically indicated biopsy, according to the concentrations of angiogenin in urines\*.

| Characteristic                               | uANG<br>1th quartile<br>(n=61) | uANG<br>2th quartile<br>(n=61) | uANG<br>3th quartile<br>(n=61) | uANG<br>4th quartile<br>(n=59) | P value <sup>¶</sup> |
|----------------------------------------------|--------------------------------|--------------------------------|--------------------------------|--------------------------------|----------------------|
| Urinary angiogenin/creatinin (ng/mmol)       | 99±33                          | 195±27                         | 334±55                         | 1214±1095                      | <0.001               |
| Time interval after transplantation (months) | 37.7±36                        | 49.5±74                        | 39.8±54                        | 33±63                          | 0.48                 |
| Age (yrs)                                    | 43.6±14.2                      | 42.7±17.1                      | 47±17.7                        | 48±16.5                        | 0.45                 |
| Male sex-n (%)                               | 37 (60)                        | 35 (57)                        | 42 (68)                        | 35 (59)                        | 0.57                 |
| Cause of ESRD                                |                                |                                |                                |                                | 0.43                 |
| • GN                                         | 14 (2)                         | 10 (16)                        | 15 (25)                        | 14 (23)                        |                      |
| • Diabetes                                   | 2 (3)                          | 7 (11.5)                       | 7 (11)                         | 6 (10)                         |                      |
| • Cystic/hereditary                          | 11 (18)                        | 12 (20)                        | 9 (15)                         | 10 (17)                        |                      |
| • Secondary GN                               | 4 (6.5)                        | 0                              | 3 (5)                          | 2 (3)                          |                      |
| • Hypertension                               | 7 (11.5)                       | 8 (13)                         | 4 (6)                          | 3 (5)                          |                      |
| • Interstitial nephritis                     | 9 (14)                         | 10 (16)                        | 7 (11)                         | 15 (25)                        |                      |
| • Miscellaneous                              | 0                              | 3 (5)                          | 2 (3)                          | 3 (5)                          |                      |
| • Uncertain                                  | 14 (23)                        | 11 (18)                        | 13 (21)                        | 6 (10)                         |                      |
| Donor age (yrs)                              | 53.3±13.5                      | 54±16.5                        | 54.3±19                        | 51.6±17.6                      | 0.84                 |
| Living donor-n (%)                           | 15 (26)                        | 18 (29)                        | 13 (21)                        | 10 (16)                        | 0.37                 |
| Expanded criteria donor-n (%)                | 26 (43)                        | 25 (43)                        | 24 (40)                        | 31 (52)                        | 0.55                 |
| Retransplantation-n (%)                      | 9 (15)                         | 6 (10)                         | 12 (20)                        | 17 (28)                        | 0.04                 |
| Preformed anti HLA DSA-n (%)                 | 15 (30)                        | 14 (29)                        | 15 (30)                        | 24 (48)                        | 0.55                 |
| Cold ischemia time (hours)                   | 15.8±10.1                      | 16.5±12.1                      | 17.8±9.7                       | 18.7±10.4                      | 0.44                 |
| Delayed graft function-n (%)                 | 14 (23)                        | 11 (19)                        | 16 (27)                        | 23 (40)                        | 0.05                 |

\* Plus-minus values are means±SD. ESRD denotes end stage renal disease, GN glomerulonephritis, DSA donor specific antibodies.

¶ The P value is for the comparison between patients across the quartiles of the distribution of uANG, which refers to Ln (urinary angiogenin/creatinin).

**Supplementary table 4.** Hazard ratio (univariate and multivariate models) for post-biopsy failure after 3 months according to individual clinical and histological parameters in Cox proportional hazards analysis\*.

| Characteristic                                                                        | Unadjusted Hazard ratio | P value | Adjusted Hazard ratio | P value |
|---------------------------------------------------------------------------------------|-------------------------|---------|-----------------------|---------|
| Recipient age, per increase of 1 yr                                                   | 0.96 (0.93-0.99)        | 0.01    | 1 (0.97-1.05)         | 0.73    |
| Time to transplantation, per increase of 1 yr                                         | 1.09 (1.03-1.14)        | 0.02    | 1.13 (1.01-1.25)      | 0.02    |
| i+t ≥2 versus <2                                                                      | 3.44 (1.31-8.74)        | 0.01    | 2.23 (0.82-5.61)      | 0.11    |
| ci+ct ≥2 versus <2                                                                    | 1.52 (1.13-2.25)        | 0.003   | 3.25 (0.82-14.6)      | 0.09    |
| DSA at biopsy (Yes versus No)                                                         | 2.97 (0.99-10.8)        | 0.05    | 2.11 (0.79-5.79)      | 0.13    |
| Plasma creatinin at biopsy ≥180 µmol/L versus <180 µmol/L <sup>¶</sup>                | 3.96 (1.42-14)          | 0.007   | 3.57 (1.25-13.09)     | 0.01    |
| Urine protein-to-creatinin ratio at biopsy ≥0.1g/mmol versus <0.1 g/mmol <sup>£</sup> | 3.25 (1.28-8.51)        | 0.01    | 1.88 (0.72-5.01)      | 0.19    |
| uANG at biopsy (ng/mmol creat) <sup>\$</sup>                                          |                         |         |                       |         |
| • ≥5.48 ng/mmol versus <5.48 ng/mmol                                                  | 5.41 (1.94-19.1)        | 0.0009  | 3.37 (1.05-14.97)     | 0.03    |
| • per unit increment                                                                  | 2.95 (1.72-4.96)        | 0.0001  | 2.60 (1.53-4.47)      | 0.0005  |

\*Adjusted hazard ratios were calculated with the use of a multivariate model incorporating all covariates listed in the table, and which were associated (p<0.1) with graft loss in the univariate analysis.

¶ Plasma Creatinin at biopsy ≥180 µmol/L versus <180 µmol/L corresponds to the median of the distribution of the creatinin values in the cohort.

£ Urine protein-to-creatinin ratio at biopsy ≥0.1g/mmol versus <0.1 g/mmol which corresponds to 1g/24 hours, a validated cut-off for diagnosis, prognosis and management.

\$ uANG at biopsy at biopsy ≥5.48 ng/mmol versus <5.48 ng/mmol L corresponds to the median of the distribution of the uANG values in the cohort.

## Supplementary methods

### *In vitro studies*

**Cell culture-** Human renal epithelial cells (HK-2 cells) were established by transduction with human papilloma virus (HPV 16) E6/E7 genes from a primary proximal tubule cells culture from normal adult human renal cortex exposed to a recombinant retrovirus containing the HPV 16 E6/E7 genes. HK-2 cells are cultured in Dulbecco's Modified Eagle Medium (DMEM) containing 5 µg/mL insulin, 10 µg/mL human apotransferrin, 500 ng/mL hydrocortisone, 10 ng/mL Epithelial growth factor, 6.5 ng/mL triiodothyronin, 5 ng/mL sodium selenite, 1% fetal calf serum, 25 IU/mL penicillin, 25 µg/mL streptomycin and 10 mM HEPES buffer. These cells lines are Mycoplasma free (Mycoalert Mycoplasma Detection Kit, Lonza). Tunicamycin was from Sigma Aldrich.

**RNA extraction and real-time quantitative polymerase chain reaction (RT-qPCR)-**Total RNA was extracted using the RNeasy Mini Kit® (Qiagen) according to the manufacturer's protocol. Transcript expression levels were quantified through SYBR green RT-qPCR using an ABI PRISM 7900 sequence detector system (Applied Biosystems). Vehicle-treated samples were used as controls, and the fold-changes for each tested gene were normalized to the Ribosomal Protein L13A (RPL13A) housekeeping gene. The relative expression levels were calculated using the  $2^{-\Delta\Delta CT}$  method. The primers used for XBP1 have the following sequence: unspliced xbp1 Forward 5'-aaacagagtagcagctcagactgc, unspliced xbp1 Reverse 5'-tcctcctgggtagacctctgggag ; spliced XBP1 Forward 5'-tgctgagtcgcgagcaggtg, spliced xbp1 Reverse 5'-gctggcaggctctggggaag.

**ELISA in vitro-**Subconfluent cells were grown in 6 wells plates for the indicated times under the indicated conditions. Secretion of angiogenin in the culture medium was quantified in the cell culture supernatant using the Quantikine® human Angiogenin immunoassay (RD Systems), according to the manufacturer's protocol.

### *Protein extraction and Western blot analysis*

Total protein lysate from human renal epithelial cells was separated by sodium dodecyl sulfate polyacrylamide gel electrophoresis under denaturing conditions and transferred to a PVDF membrane (GE Healthcare). Primary antibodies were visualized using horseradish peroxidase-conjugated polyclonal secondary antibodies (Dako) and detected by ECL reagent® (GE Healthcare).

## **Supplementary figure legends**

### **Supplementary figure 1**

**A.** Calibrating curve of the ELISA method for urinary angiogenin monitoring. **B.** Distribution of the values of urinary angiogenin/creatinin and the log transformed values.

### **Supplementary figure 2**

Linear regression analysis of uANG with plasma creatinin and proteinuria in the cohort of 242 kidney transplant recipients with a clinically indicated biopsy.

### **Supplementary figure 3**

Box and whiskers plots representing the distribution of uANG according to the deceased donor and the period of time after transplantation during which uANG has been measured (before or after 3 months).\*,  $p=0.03$ , Student's T test.

SUPPLEMENTARY FIGURE 1

A

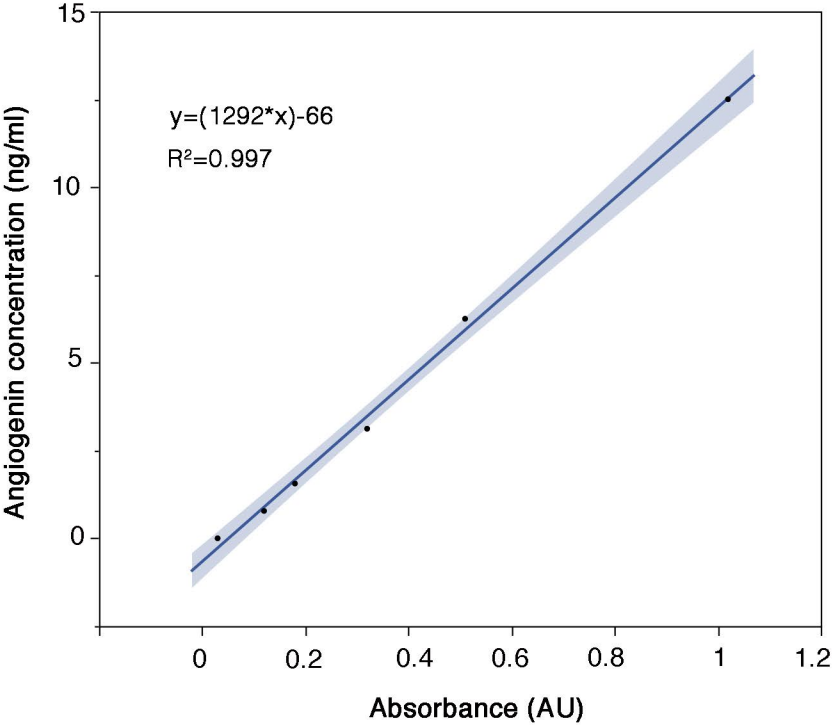

B

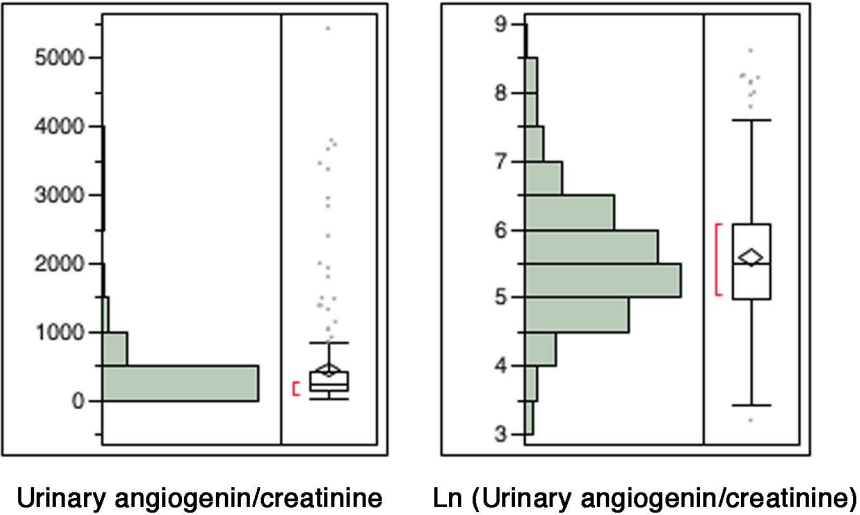

SUPPLEMENTARY FIGURE 2

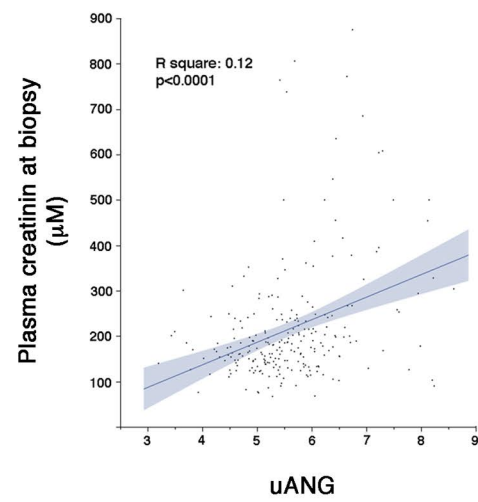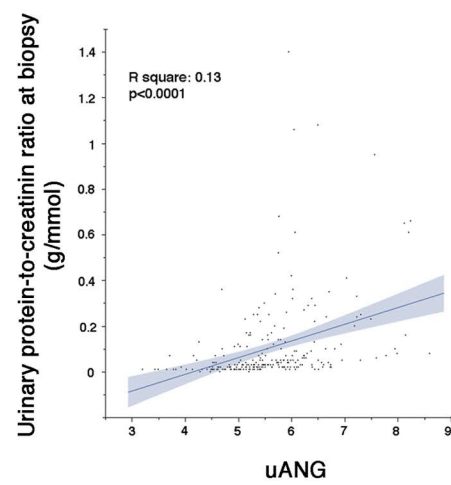

SUPPLEMENTARY FIGURE 3

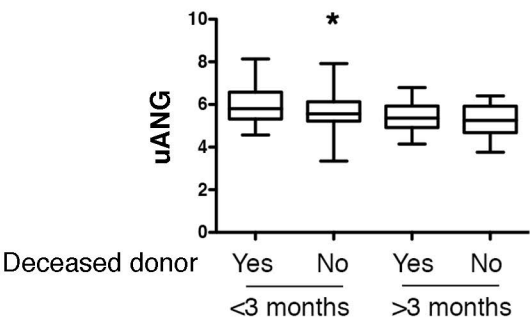

Supplement: ASN.2016020218SupplementaryData.pdf [file ASN.2016020218SupplementaryData.pdf]
